# Supplementary material for: Protonation and lanthanide(iii) complexation equilibria of a new tripodal polyaza-polycatechol-amine
Source: Royal Society of Chemistry journal article supplement (doi:10.1039/b822945g), 2009-01-01

# Protonation and Lanthanide(III) Complexation Equilibria of a New Tripodal Polyaza- Polycatechol-amine.

*P. Di Bernardo<sup>a</sup>, P.L. Zanonato<sup>a</sup>, A. Bismondo<sup>b</sup>, A. Melchior<sup>c</sup>, M. Tolazzi<sup>c</sup>*

*<sup>a</sup>Dipartimento di Scienze Chimiche, Università di Padova, Via Marzolo 1,  
35131 Padova, ITALY*

*<sup>b</sup>Istituto di Chimica Inorganica e delle Superfici del CNR, Corso Stati Uniti 4,  
35127 Padova, ITALY*

*<sup>c</sup>Dipartimento di Scienze e Tecnologie Chimiche, Università di Udine, Via del Cotonificio  
108, 33100 Udine, ITALY*

## **Electronic Supplementary Information**

\*Corresponding authors:

Tel +39-049-8275213; fax +39-049-8275161; e-mail: [plinio.dibernardo@unipd.it](mailto:plinio.dibernardo@unipd.it)

Tel +39-0432-558852; fax +39-0432-558803; e-mail: [marilena.tolazzi@uniud.it](mailto:marilena.tolazzi@uniud.it)

**Table S1.** Acidity of STRENCAT secondary ammonium in  $\text{LnH}_n\text{L}^{(3+n)-}$  and  $\text{H}_n\text{L}^{(6-n)-}$  ( $n = 0-2$ ). Stability constants for the reported deprotonation reactions:

Acidity of secondary ammonium of STRENCAT

| Reaction (4)                                                                                 | -log $K'_a$ |       |       |
|----------------------------------------------------------------------------------------------|-------------|-------|-------|
|                                                                                              | La          | Gd    | Yb    |
| $n = 0 \text{ LnL}^{3-} \rightleftharpoons \text{LnH}_1\text{L}^{4-} + \text{H}^+$           | 10.44       | 10.58 | 10.56 |
| $n = 1 \text{ LnH}_1\text{L}^{4-} \rightleftharpoons \text{LnH}_2\text{L}^{5-} + \text{H}^+$ | 11.46       | 11.16 | 12.77 |
| $n = 3 \text{ LnH}_2\text{L}^{5-} \rightleftharpoons \text{LnH}_3\text{L}^{6-} + \text{H}^+$ | ---         | 11.74 | 12.40 |

  

| Reaction (5)                                                                             | -log $K_a$ |
|------------------------------------------------------------------------------------------|------------|
| $n = 0 \text{ H}_3\text{L}^{3-} \rightleftharpoons \text{H}_2\text{L}^{4-} + \text{H}^+$ | 9.80       |
| $n = 1 \text{ H}_2\text{L}^{4-} \rightleftharpoons \text{HL}^{5-} + \text{H}^+$          | 10.54      |
| $n = 2 \text{ HL}^{5-} \rightleftharpoons \text{L}^{6-} + \text{H}^+$                    | 11.42      |

**Table S2.** Experimental conditions of potentiometry for Ln(III)/STRENCAT complexation at 25 °C.  $I = 0.100 \text{ mol dm}^{-3}$  ( $\text{NaClO}_4$ ).  $C_L$ ,  $C_{\text{Ln}}$  and  $C_H$ : stoichiometric concentrations of STRENCAT ( $\text{L}^{6-}$ ), lanthanide(III) and proton.

| Ln(III) | Cup solution |                                |                                          |                                | Titrant NaOH                             |
|---------|--------------|--------------------------------|------------------------------------------|--------------------------------|------------------------------------------|
|         | $V^0$<br>mL  | $C_L$<br>mmol $\text{dm}^{-3}$ | $C_{\text{Ln}}$<br>mmol $\text{dm}^{-3}$ | $C_H$<br>mmol $\text{dm}^{-3}$ | $C_{\text{OH}}$<br>mmol $\text{dm}^{-3}$ |
| La      | 20.13        | 1.270                          | 1.232                                    | 8.480                          | 100.8                                    |
| La      | 20.13        | 1.238                          | 0.618                                    | 9.399                          | 100.8                                    |
|         |              |                                |                                          |                                |                                          |
| Gd      | 20.13        | 1.627                          | 1.503                                    | 10.12                          | 101.0                                    |
| Gd      | 20.13        | 1.609                          | 0.805                                    | 9.866                          | 101.0                                    |
|         |              |                                |                                          |                                |                                          |
| Yb      | 20.13        | 1.671                          | 1.666                                    | 10.09                          | 101.0                                    |
| Yb      | 20.13        | 1.606                          | 0.799                                    | 9.826                          | 101.0                                    |
|         |              |                                |                                          |                                |                                          |

**FIGURE S1.** Electronic spectra of a solution of STRENCAT  $4.1 \cdot 10^{-5} \text{ mol dm}^{-3}$  at different  $p[\text{H}^+]$ : a)  $p[\text{H}^+] = 4.03$ ; b)  $p[\text{H}^+] = 5.46$ ; c)  $p[\text{H}^+] = 6.07$ ; d)  $p[\text{H}^+] = 6.65$ ; e)  $p[\text{H}^+] = 7.17$  f)  $p[\text{H}^+] = 9.43$ ; g)  $p[\text{H}^+] = 10.23$ ; h)  $p[\text{H}^+] = 11.8$  .

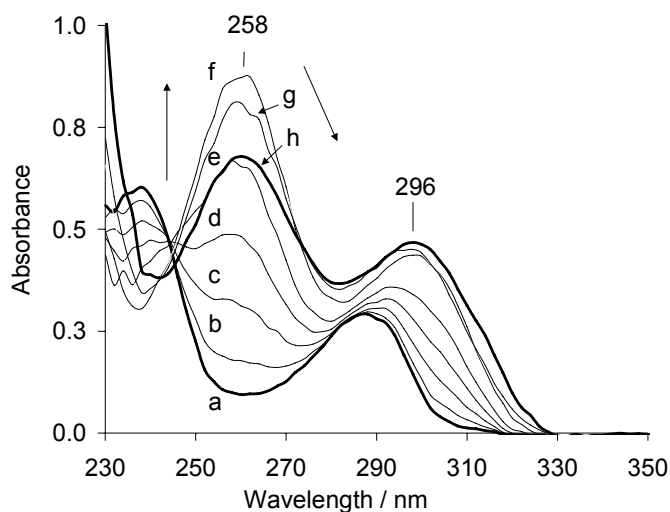

**Figures S2, S3 and S4.** Potentiometric titration curves of STRENCAT and lanthanides(III) in 1:1 (curve a) and 2:1 (curve b) molar ratios. Full lines: calculated with concentrations given in Table S2 and stability constants of Tables 1 and 2. Symbols represent only some experimental values.

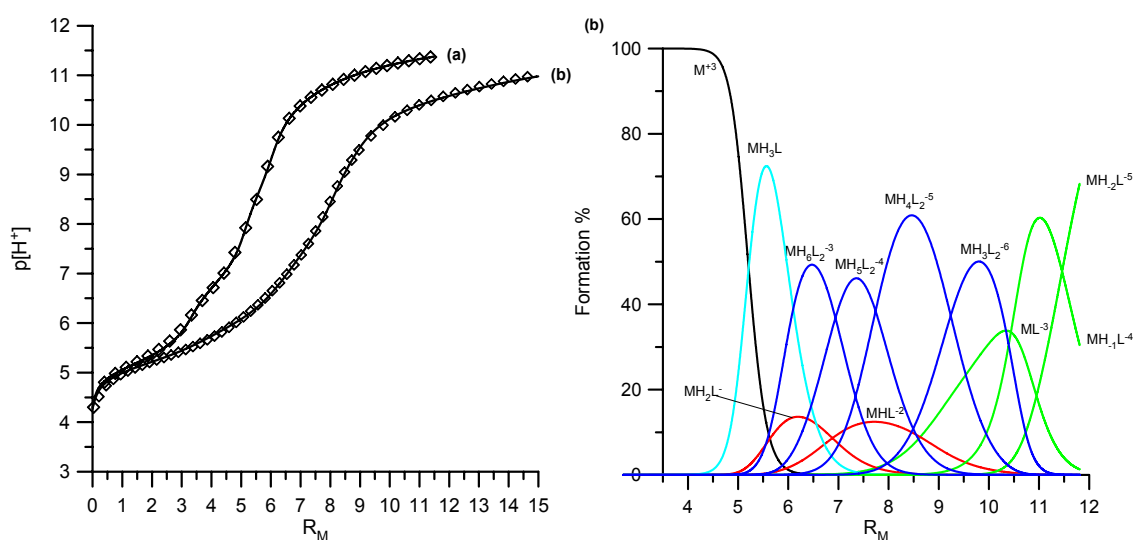

**Figure S2.**  $M = \text{La}$ . Plot on the right was calculated for 2:1 ligand-metal ratio.

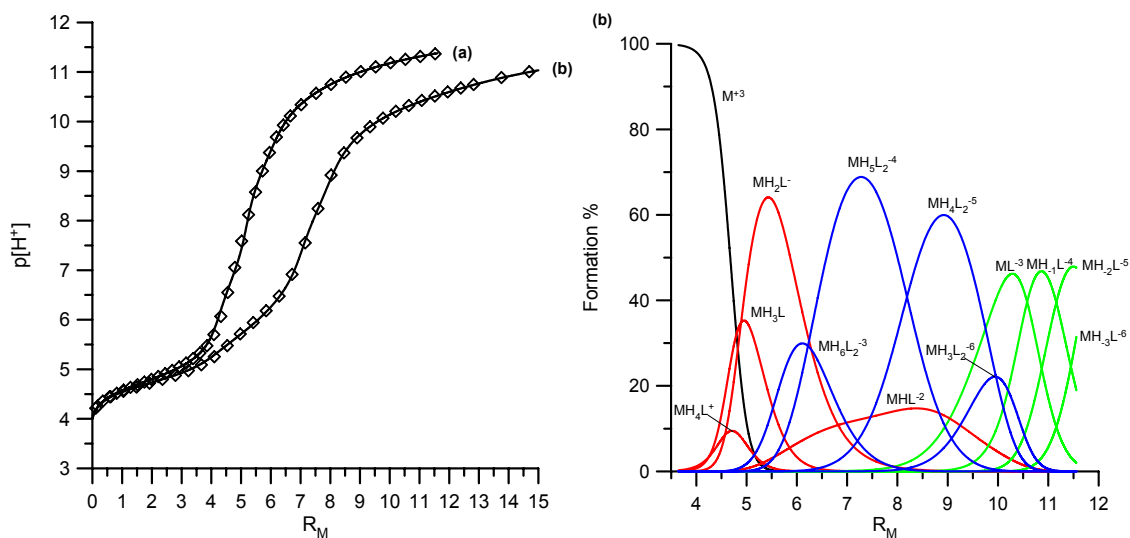

Figure S3. M = Gd. Plot on the right was calculated for 2:1 ligand-metal ratio.

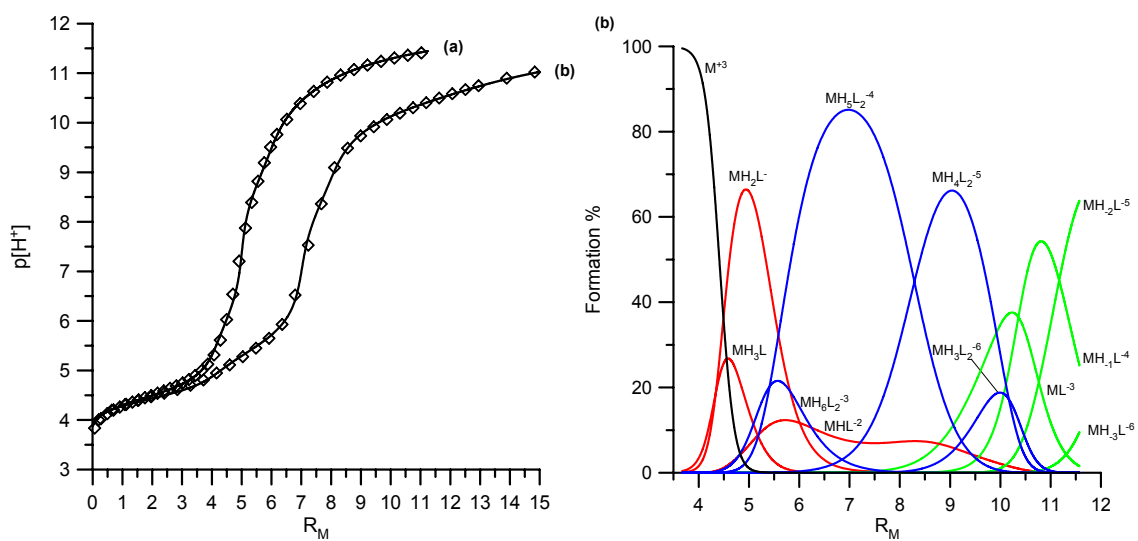

Figure S4. M = Yb. Plot on the right was calculated for 2:1 ligand-metal ratio.

**Figure S5.** Electronic spectra changes during titration of  $\text{Gd}^{3+}$ /STRENCAT. ( $L =$  STRENCAT,  $C_L = 4.0 \cdot 10^{-5} \text{ mol dm}^{-3}$ ,  $C_L/C_{\text{Gd}} = 1$ ).

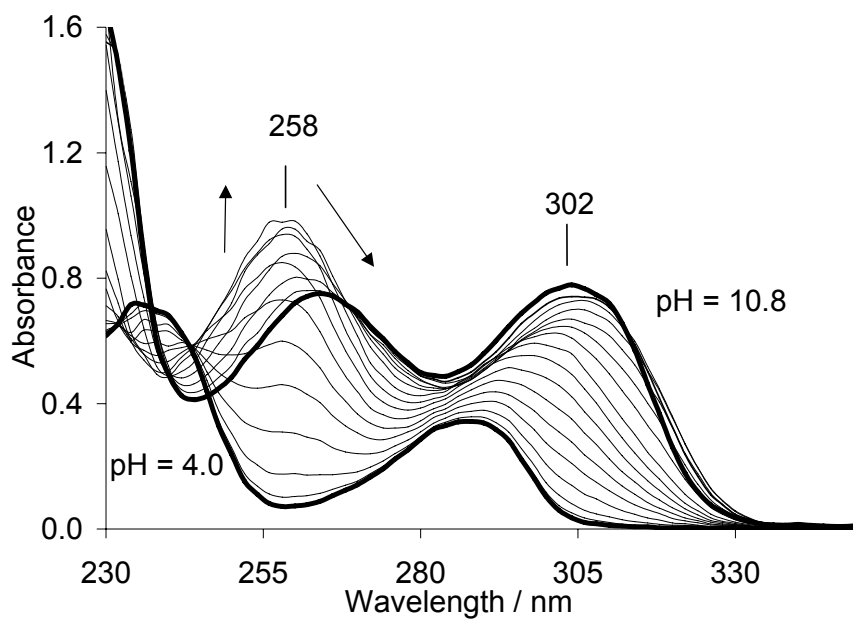

**Figure S6.** ESI-MS spectra of Gd(III)/STRENCAT solution prepared at pH = 6.1.  $C_{\text{Gd}} = 4 \cdot 10^{-5} \text{ mol dm}^{-3}$ ,  $C_{\text{Gd}}/C_{\text{L}} = 1$ : a) positive mode ; b) negative mode.

a)

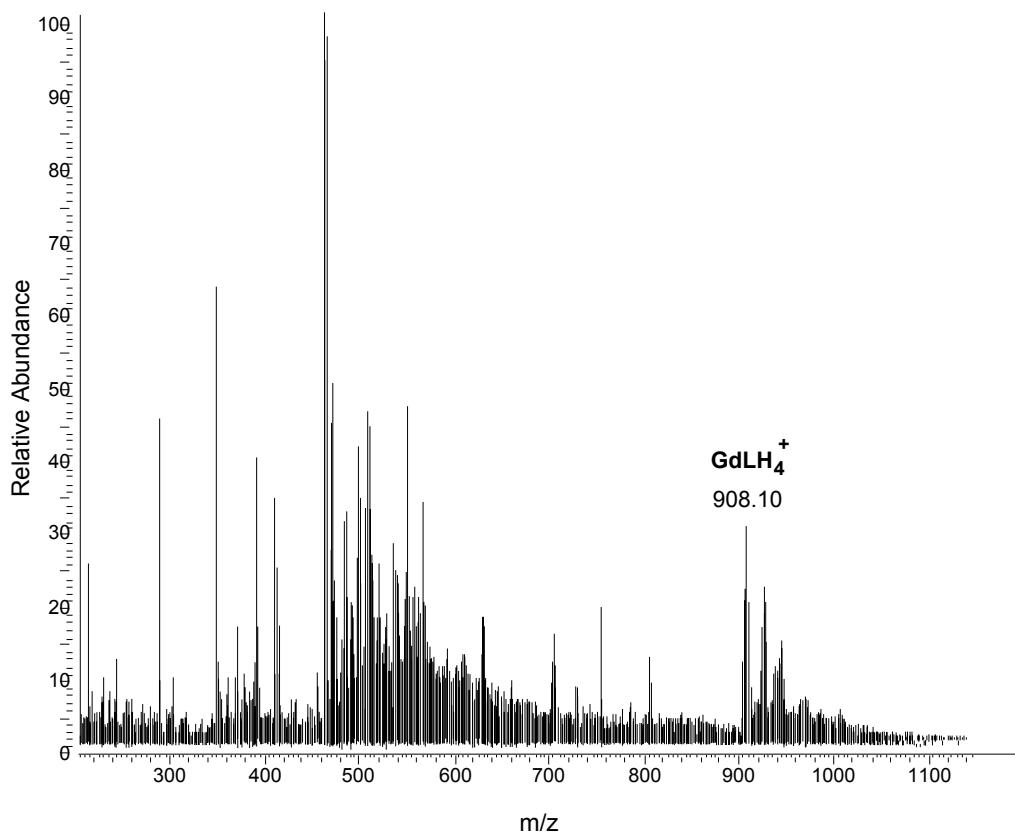

b)

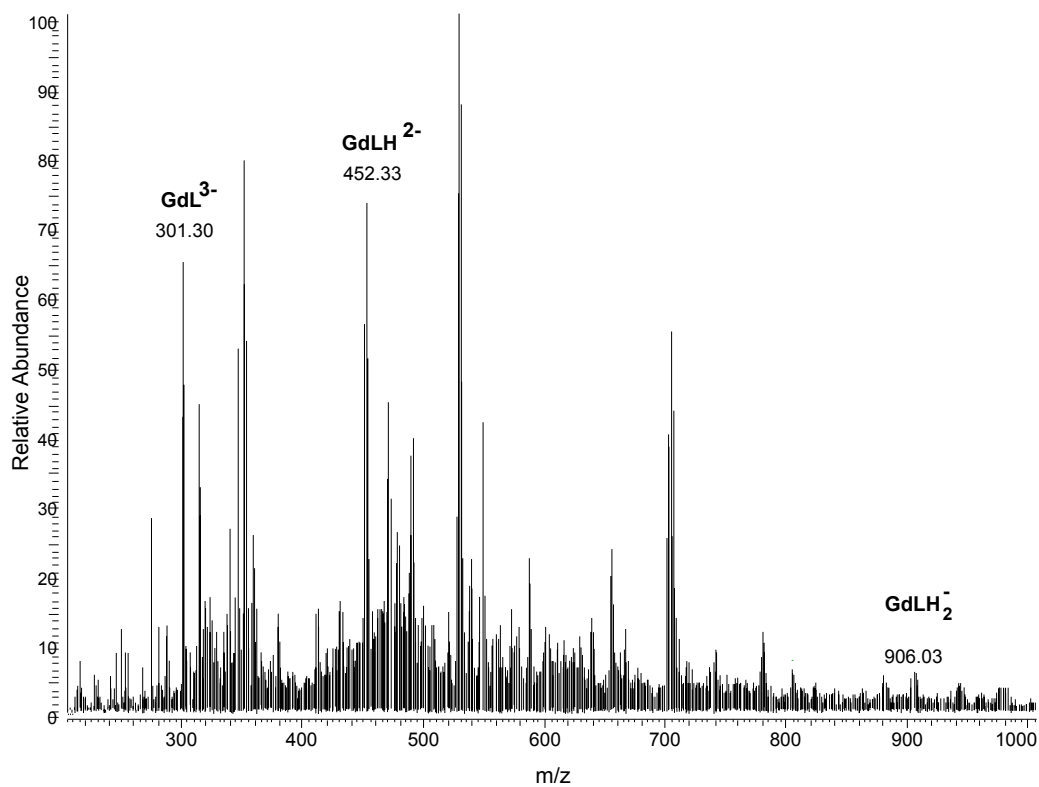

Supplement: b822945g.pdf [file b822945g.pdf]
